# Supplementary material for: Donor funding health policy and systems research in low- and middle-income countries: how much, from where and to whom
Source: PubMed Central journal article supplement (PMC5577666; doi:10.1186/s12961-017-0224-6), 2017-08-31
Supplement: 12961_2017_224_MOESM1_ESM.pdf [file 12961_2017_224_MOESM1_ESM.pdf]

**Appendix Table 1: List of donors in the OECD CRS Database, 2000-14**

| <b>Bilateral donors</b> | <b>Multilateral donors</b>        | <b>Private donors</b>             |
|-------------------------|-----------------------------------|-----------------------------------|
| 1 Algeria               | 1 AfDB                            | 1 Bill & Melinda Gates Foundation |
| 2 Australia             | 2 AfDF                            |                                   |
| 3 Austria               | 3 Arab Fund (AFESD)               |                                   |
| 4 Belgium               | 4 AsDB                            |                                   |
| 5 Bulgaria              | 5 AsDB Special Funds              |                                   |
| 6 Canada                | 6 BADEA                           |                                   |
| 7 Chinese Taipei        | 7 CarDB                           |                                   |
| 8 Croatia               | 8 Climate Investment Fund         |                                   |
| 9 Cyprus                | 9 EBRD                            |                                   |
| 10 Czech Republic       | 10 GAVI                           |                                   |
| 11 Denmark              | 11 GEF                            |                                   |
| 12 Estonia              | 12 Global Fund                    |                                   |
| 13 EU Institutions      | 13 Global Green Growth Institute  |                                   |
| 14 Finland              | 14 IAEA                           |                                   |
| 15 France               | 15 IBRD                           |                                   |
| 16 Germany              | 16 IDA                            |                                   |
| 17 Greece               | 17 IDB                            |                                   |
| 18 Hungary              | 18 IDB Sp.Fund                    |                                   |
| 19 Iceland              | 19 IFAD                           |                                   |
| 20 Iraq                 | 20 IFC                            |                                   |
| 21 Ireland              | 21 IMF                            |                                   |
| 22 Israel               | 22 IMF (Concessional Trust Funds) |                                   |
| 23 Italy                | 23 Isl.Dev Bank                   |                                   |
| 24 Japan                | 24 Montreal Protocol              |                                   |
| 25 Kazakhstan           | 25 Nordic Dev.Fund                |                                   |
| 26 Korea                | 26 OFID                           |                                   |
| 27 Kuwait (KFAED)       | 27 OSCE                           |                                   |
| 28 Latvia               | 28 UN Agencies                    |                                   |
| 29 Libya                | 29 UNAIDS                         |                                   |
| 30 Liechtenstein        | 30 UNDP                           |                                   |
| 31 Lithuania            | 31 UNECE                          |                                   |
| 32 Luxembourg           | 32 UNEP                           |                                   |
| 33 Malta                | 33 UNFPA                          |                                   |
| 34 Netherlands          | 34 UNHCR                          |                                   |
| 35 New Zealand          | 35 UNICEF                         |                                   |
| 36 Norway               | 36 UNPBF                          |                                   |
| 37 Poland               | 37 UNRWA                          |                                   |
| 38 Portugal             | 38 UNTA                           |                                   |
| 39 Qatar                | 39 WFP                            |                                   |
| 40 Romania              | 40 WHO                            |                                   |
| 41 Russia               |                                   |                                   |
| 42 Saudi Arabia         |                                   |                                   |
| 43 Slovak Republic      |                                   |                                   |
| 44 Slovenia             |                                   |                                   |
| 45 Spain                |                                   |                                   |
| 46 Sweden               |                                   |                                   |
| 47 Switzerland          |                                   |                                   |
| 48 Thailand             |                                   |                                   |
| 49 Turkey               |                                   |                                   |
| 50 United Arab Emirates |                                   |                                   |
| 51 United Kingdom       |                                   |                                   |
| 52 United States        |                                   |                                   |

Note: AfDB=African Development Bank, AfDF=African Development Fund, AsDB=Asian Development Bank, BADEA=Arab Bank for Economic Development in Africa, EBRD=European Bank for Reconstruction and Development, GAVI=The Vaccine Alliance, GEF=Global Environment Facility, IBRD=International Bank for Reconstruction and Development, IDA=International Development Association, IDB=Inter-American Development Bank, IFAD=International Fund for Agricultural Development, OFID=OPEC Fund for International Development, UNAIDS=The Joint Programme on HIV/AIDS, UNDP=United Nations Development Program, UNECE=United Nations Economic Commission for Europe, UNFPA=United Nations Population Fund, UNICEF=United Nations Children's Fund, UNPBF=United Nations Peace Building Fund, UNRWA=United Nations Relief and Works Agency, WFP=United Nations World Food Programme, WHO=World Health Organization.
