# Supplementary material for: Donor funding health policy and systems research in low- and middle-income countries: how much, from where and to whom
Source: PubMed Central journal article supplement (PMC5577666; doi:10.1186/s12961-017-0224-6), 2017-08-31
Supplement: 12961_2017_224_MOESM2_ESM.pdf [file 12961_2017_224_MOESM2_ESM.pdf]

**Appendix Table 2: Alliance reports searched for keyword analysis**

| <b>Year</b> | <b>Author</b>                                                                          | <b>Title</b>                                                                      | <b>Available at:</b>                                                                                                                                                |
|-------------|----------------------------------------------------------------------------------------|-----------------------------------------------------------------------------------|---------------------------------------------------------------------------------------------------------------------------------------------------------------------|
| 2004        | Alliance for Health Policy and Systems Research                                        | Strengthening Health Systems: The Role and Promise of Policy and Systems Research | <a href="http://www.who.int/alliance-hpsr/resources/Strengthening_complet.pdf">http://www.who.int/alliance-hpsr/resources/Strengthening_complet.pdf</a>             |
| 2007        | Green A, Bennett S, and the Alliance for Health Policy and Systems Research            | Sound Choices: Enhancing Capacity for Evidence-Informed Health Policy             | <a href="http://www.who.int/alliance-hpsr/resources/publications/9789241595902/en/">http://www.who.int/alliance-hpsr/resources/publications/9789241595902/en/</a>   |
| 2009        | Savigny D, Adam, T, and the Alliance for Health Policy and Systems Research            | Systems Thinking for Health Systems Strengthening                                 | <a href="http://www.who.int/alliance-hpsr/resources/flagshipreports/en/">http://www.who.int/alliance-hpsr/resources/flagshipreports/en/</a>                         |
| 2014        | Bigdeli M, Peters D, Wagner A, and the Alliance for Health Policy and Systems Research | Medicines in Health Systems: Advancing access, affordability and appropriate use  | <a href="http://www.who.int/alliance-hpsr/resources/publications/9789241507622/en/">http://www.who.int/alliance-hpsr/resources/publications/9789241507622/en/</a>   |
| 2012        | Gilson L and the Alliance for Health Policy and Systems Research                       | Health Policy and Systems Research - A Methodology Reader                         | <a href="http://www.who.int/alliance-hpsr/resources/publications/9789241503136/en/">http://www.who.int/alliance-hpsr/resources/publications/9789241503136/en/</a>   |
| 2013        | Peters D, Tran N, and Adam T                                                           | Implementation Research in Health: A Practical Guide                              | <a href="http://www.who.int/alliance-hpsr/resources/implementationresearchguide/en/">http://www.who.int/alliance-hpsr/resources/implementationresearchguide/en/</a> |
| 2012        | World Health Organization                                                              | Changing Mindsets - The WHO Strategy on Health Policy and Systems Research        | <a href="http://www.who.int/alliance-hpsr/resources/publications/9789241504409/en/">http://www.who.int/alliance-hpsr/resources/publications/9789241504409/en/</a>   |
