# Supplementary material for: Donor funding health policy and systems research in low- and middle-income countries: how much, from where and to whom
Source: PubMed Central journal article supplement (PMC5577666; doi:10.1186/s12961-017-0224-6), 2017-08-31
Supplement: 12961_2017_224_MOESM3_ESM.pdf [file 12961_2017_224_MOESM3_ESM.pdf]

**Appendix Table 3: List of keywords used in analysis**

| Health Policy and Health Systems      |                               |                                   | Research                        | Flag Words           |
|---------------------------------------|-------------------------------|-----------------------------------|---------------------------------|----------------------|
| 1 access                              | 55 healthcare system          | 110 public hospital               | 1 action research               | 1 immigration        |
| 2 advancing access                    | 56 hospital                   | 111 public sector                 | 2 analysis                      | 2 development policy |
| 3 affordability                       | 57 hospital care              | 112 public spending               | 3 assess                        | 3 poverty reduction  |
| 4 budget support                      | 58 hospital management        | 113 quality                       | 4 audit                         | 4 nutrition          |
| 5 capacity building                   | 59 human resource             | 114 quality improvement           | 5 case studies                  | 5 sanitation         |
| 6 clinic                              | 60 human resources for health | 115 reform                        | 6 case study                    |                      |
| 7 cost effective                      | 61 immunization               | 116 reform process                | 7 causal                        |                      |
| 8 costs                               | 62 impact                     | 117 report                        | 8 cost effective                |                      |
| 9 data                                | 63 implementation             | 118 sector reform                 | 9 costs                         |                      |
| 10 decision maker                     | 64 influence                  | 119 service delivery              | 10 data                         |                      |
| 11 decision making                    | 65 information                | 120 social capital                | 11 data collection              |                      |
| 12 delivery                           | 66 information system         | 121 social determinants           | 12 economic                     |                      |
| 13 doctor                             | 67 infrastructure             | 122 social determinants of health | 13 effectiveness                |                      |
| 14 drug                               | 68 insurance scheme           | 123 social network                | 14 equity                       |                      |
| 15 economic                           | 69 intellectual property      | 124 social science                | 15 evaluate                     |                      |
| 16 effective                          | 70 knowledge                  | 125 social scientist              | 16 evaluation                   |                      |
| 17 equitable                          | 71 leadership                 | 126 socio economic                | 17 evidence                     |                      |
| 18 equity                             | 72 medical care               | 127 staff                         | 18 focus group                  |                      |
| 19 essential medicines                | 73 medical centre             | 128 statistics                    | 19 group discussion             |                      |
| 20 financial incentive                | 74 medical education          | 129 strengthen health systems     | 20 health research              |                      |
| 21 financial incentives               | 75 medicine                   | 130 strengthening health systems  | 21 health systems approach      |                      |
| 22 financial sustainability           | 76 national health insurance  | 131 system performance            | 22 health systems interventions |                      |
| 23 financing                          | 77 network                    | 132 system strengthening          | 23 impact                       |                      |
| 24 guideline                          | 78 network development        | 133 systems                       | 24 influence                    |                      |
| 25 guidelines                         | 79 nurses                     | 134 systems approach              | 25 intervention                 |                      |
| 26 health care                        | 80 p4p                        | 135 systems intervention          | 26 interview                    |                      |
| 27 health centre                      | 81 performance                | 136 systems perspective           | 27 investigate                  |                      |
| 28 health coverage                    | 82 personnel                  | 137 systems research              | 28 method                       |                      |
| 29 health equity                      | 83 pharmaceutical             | 138 systems strengthening         | 29 mixed method                 |                      |
| 30 health facilities                  | 84 policies                   | 139 systems thinking              | 30 performance                  |                      |
| 31 health financing                   | 85 policy                     | 140 theory                        | 31 policy analysis              |                      |
| 32 health information                 | 86 policy analysis            | 141 training                      | 32 policy intervention          |                      |
| 33 health information system          | 87 policy change              | 142 trust                         | 33 process                      |                      |
| 34 health insurance                   | 88 policy development         | 143 uhc                           | 34 process evaluation           |                      |
| 35 health market                      | 89 policy implementation      | 144 universal health              | 35 qualitative                  |                      |
| 36 health organisation                | 90 policy intervention        | 145 universal health coverage     | 36 qualitative research         |                      |
| 37 health planning                    | 91 policy maker               | 146 vaccine                       | 37 question                     |                      |
| 38 health planning and management     | 92 policy process             |                                   | 38 report                       |                      |
| 39 health policies                    | 93 policymaker                |                                   | 39 research                     |                      |
| 40 health policy                      | 94 political                  |                                   | 40 research method              |                      |
| 41 health policy and planning         | 95 politics                   |                                   | 41 research question            |                      |
| 42 health policy and systems          | 96 primary care               |                                   | 42 research strategy            |                      |
| 43 health policy and systems research | 97 primary health             |                                   | 43 researcher                   |                      |
| 44 health professionals               | 98 primary health care        |                                   | 44 respondent                   |                      |
| 45 health project                     | 99 private health sector      |                                   | 45 social science               |                      |
| 46 health reform                      | 100 private hospital          |                                   | 46 statistics                   |                      |
| 47 health sector                      | 101 private sector            |                                   | 47 study                        |                      |
| 48 health sector reform               | 102 process                   |                                   | 48 study design                 |                      |
| 49 health services                    | 103 process evaluation        |                                   | 49 survey                       |                      |
| 50 health spending                    | 104 provision                 |                                   | 50 systems interventions        |                      |
| 51 health system                      | 105 provision                 |                                   | 51 systems research             |                      |
| 52 health system strengthening        | 106 public health             |                                   | 52 systems thinking             |                      |
| 53 health worker                      | 107 public health policy      |                                   | 53 theory                       |                      |
| 54 healthcare                         | 108 public healthcare         |                                   | 54 understand                   |                      |
